# Supplementary material for: Rock alteration at the post-Variscan nonconformity: implications forCarboniferous-Permian surface weathering versus burial diagenesisand paleoclimate evaluation
Source: Copernicus journal article supplement (doi:10.5194/se-2020-221), 2021-01-25
Supplement: Supplementary file 1 [file Table (S1, S2, S3, S4, S5).xlsx]

## Sheet: Appendix
Table S1
	depth	Plagioclase	K-feldspar	Pyroxene	Amphibole	Quartz	Illite/Muscovite	Vermiculite	Kaolinite	Mixed layer I-S	Anatase	Hematite	Calcite	Dolomite
		RIR: 0.64	RIR: 0.6	RIR: 1.2	RIR: 0.73	RIR: 3.03	RIR: 0.43	RIR: 0.76	RIR: 1.0	RIR: 0.2	RIR: 4.05	RiR: 3.26	RIR: 3.2	RIR: 2.51
	[m]	[rel. wt%]	[rel. wt%]	[rel. wt%]	[rel. wt%]	[rel. wt%]	[rel. wt%]	[rel. wt%]	[rel. wt%]	[rel. wt%]	[rel. wt%]	[rel. wt%]	[rel. wt%]	[rel. wt%]
Basaltic andesite	13.9	0	0	0	0	6.05494	0	6.60168	5.05733	75.3725	2.01059	2.5249	2.37805	0
	14.5	53.799	0	3.02694	0	6.70091	8.9414	3.49914	0	0	0.73018	2.31168	20.9908	0
	15.3	66.1093	0	2.85504	0	4.59265	6.27869	4.36596	1.87379	0	0.765207	3.00157	10.1578	0
	16.3	58.032	0	2.497	0	13.2466	4.72403	3.82607	1.92613	0	0.707704	0.788993	14.2515	0
	17.84	66.4096	0	2.82789	0	11.7475	0	2.8691	2.25856	0	0.691336	2.42056	6.0719	4.70351
	19.3	76.8081	0	3.82988	0	0.88752	0	0	1.49689	0	0.953667	3.48484	11.0628	1.47621
Gabbroic diorites	20.6	7.58397	0	0	0	16.6662	48.9081	0	2.64283	19.0298	0	0.655465	4.51372	0
	21.5	7.23221	4.75211	0	0	25.8377	24.0768	0	0	28.3198	0.179967	1.0816	0	8.51978
	22.5	29.0407	0	0	0	13.0742	55.5207	0	1.56608	0	0	0.228728	0.569504	0
	23.5	27.7401	0	0	0	7.53325	60.8891	1.881	0.463969	0	0	0.220073	0.242901	1.02954
	24.5	32.1589	0	0	4.69972	12.5069	49.1837	0	0	0	0	0.396019	0.584955	0.469783
	25.5	38.7679	0	0	5.15991	11.4702	42.1884	0	0.548591	0	0	0.485509	1.00849	0.371032
	26.5	36.4508	0	0	4.87287	16.3901	40.3809	0	0	0	0	0.51891	0.791447	0.594971
	27.5	26.8795	0	0	7.88134	6.98098	56.1513	0.853116	0.545552	0	0	0.273205	0.179911	0.255089
	28.7	40.6148	0	0	3.15935	7.1017	46.771	1.01833	0.657039	0	0	0.1718	0.257044	0.248896
	55.5	45.1102	0	0	19.0936	11.6294	20.5919	0.894091	0.681987	0	0	1.2455	0.753303	0
	56.5	41.4897	0	0	18.0903	5.86859	24.9932	0.774252	0.701103	6.94944	0.202068	0.46158	0.469687	0
Table S2
	Depth(m)	MgO	Al2O3	CaO	K2O	Na2O	SiO2	P2O5	TiO2	MnO	Fe2O3	LOI
sedimentary rock	5.48	1.21649	14.375	0.529313	4.8381	1.04005	66.3498	0.102148	0.380734	0.0185724	3.58447	7.13811
	6.6	1.33595	15.3273	0.640896	4.8022	0.98391	64.6673	0.0812403	0.397175	0.0270801	1.66091	9.73301
	7.23	1.08752	15.2933	0.485502	5.31139	1.09723	69.8249	0.0873903	0.262171	0.0194201	3.26257	2.89961
	8.38	1.48572	16.508	0.592347	5.50592	1.01961	66.8867	0.0971061	0.446688	0.0194212	4.23383	2.89391
	11.3	1.64502	15.3761	0.832185	4.51896	0.899921	66.7296	0.0870891	0.67736	0.0387063	5.68014	3.23435
	12.24	1.17466	12.2858	7.3368	4.26536	1.44425	65.9253	0.0481417	0.250337	0.105912	3.00404	3.71652
	13.56	1.07264	11.4194	13.7545	3.82545	1.38589	57.1444	0.0569545	0.284773	0.322742	5.34423	5.07577
Basaltic andesite	13.9	2.58318	22.8105	1.59186	5.92191	0.0956045	47.327	0.254326	1.72274	0.0436253	8.70929	8.5
	14.3	1.94256	16.0467	11.3641	3.14898	2.57867	44.7262	0.193027	1.15378	0.234265	5.84171	12.96
	15.3	2.40425	17.5444	6.31197	2.74641	3.30596	45.8661	0.184378	1.27689	0.131174	11.3085	8.94
	16.3	2.3709	15.2253	11.8233	1.50544	3.40546	46.2239	0.144821	1.02068	0.243681	4.75654	13.22
	17.8	3.21023	13.8609	9.92285	0.349723	4.43555	45.128	0.142639	0.94176	0.185602	8.51278	13.6
	19.3	1.84083	13.8375	12.2805	0.649022	5.64123	41.3508	0.157122	0.985585	0.188368	10.279	12.16
Gabbroic diorites	20.6	3.19916	16.0104	5.82211	3.87353	0.908853	51.861	0.191768	0.788885	0.124513	7.57984	9.33
	21.5	4.97148	13.7258	5.79394	3.98732	0.798863	48.3024	0.0638041	0.650278	0.172184	8.87402	11.99
	22.5	2.41494	18.3384	4.06318	2.1431	2.8715	57.8522	0.207706	0.86528	0.0717876	6.57192	4.52
	23.5	3.15372	15.901	6.36934	1.8488	2.83749	54.2285	0.171449	0.742947	0.127635	8.83917	5.82
	24.5	2.92503	16.9847	5.75435	1.92495	3.18481	55.1722	0.195327	0.790099	0.108407	9.65015	3.02
	25.5	3.02804	17.2633	5.89789	1.86673	3.23829	55.9096	0.187656	0.829222	0.117899	8.51132	2.86
	26.7	2.97326	17.3649	5.67833	1.8127	3.06008	55.9999	0.184261	0.850881	0.116731	8.99889	2.96
	27.1	3.03732	17.3868	5.8473	1.88698	3.24611	55.9518	0.203919	0.868363	0.122937	8.44848	2.71
	28.5	3.03186	17.4823	5.36829	1.83816	3.19442	56.178	0.200072	0.800289	0.133702	8.63293	3.35
	55.5	3.24897	18.0988	6.98924	1.52643	3.43194	54.9627	0.232503	0.886544	0.159719	9.30315	1.07
	56.5	3.20274	18.0251	6.77663	1.61733	3.40727	55.4024	0.226486	0.923905	0.152654	9.03551	1.04
Table S3
	Depth(m)	Sc	Ti	V	Cr	Mn	Co	Ni	Cu	Zn	Ga	Ge	Rb	Sr	Y	Zr	Nb	Cs	Ba	Hf	Ta	Pb	Th	U
sedimentary rock	5.48	10.0647	3268.2	44.5303	37.9936	247.2	270.348	18.0195	11.6524	27.4232	17.41	2.39	42.92	196.867	48.0452	135.8	8.308	178.43	669.8	3.969	1.884	23.1602	5.88273	1.62046
	6.6	10.8246	1144.1	21.221	44.8532	623.7	73.2228	15.2855	17.8564	18.9946	12.62	1.565	31.58	262.677	10.1273	58.89	3.276	150.55	1048.8	1.742	2.272	18.0062	7.9387	1.12819
	7.23	8.88699	1626.9	28.8559	28.6958	535.8	107.614	13.0522	8.3646	15.1283	13.74	1.623	25.52	210.708	11.9471	84.61	5.7	155.27	317.2	2.459	2.833	23.0527	9.95493	1.21067
	8.38	9.7863	5656.4	34.5403	38.2818	350.7	63.6943	16.3248	5.76759	23.3011	25.7	1.665	46.46	239.852	10.9267	197.9	17.08	193.34	312	5.51	2.211	19.4192	6.0503	1.5096
	11.3	12.8808	653.1	53.3731	245.31	153.69	75.3181	36.6506	6.82513	38.0018	11.73	1.676	43.11	104.507	10.2688	47.87	2.291	180.33	335.1	1.46	1.882	11.7319	8.58526	1.50902
	12.24	10.1816	1216.8	29.2318	74.7479	312.4	99.5353	35.965	5.03757	19.74	12.71	1.652	19.09	193.53	9.12547	71.32	4.284	121.26	215.9	1.967	2.743	16.0619	4.86548	0.790983
	13.56	6.56576	1153.6	98.9072	22.4288	553.6	65.1899	43.3495	8.98438	22.7156	15.38	1.763	30.49	292.367	11.247	68.588	5.4331	121.04	366.85	1.8233	2.8613	20.8218	5.68419	1.23121
Basaltic andesite	13.9	46.09	11277.2	391.1	769.7	393.6	38.05	229.8	10.97	96.48	28.09	3.685	381	45.5	37.48	175.6	8.913	128	74.02	4.596	0.557	14.92	5.481	3.614
	14.3	32.44	7095.2	159.3	432.7	1828.3	24.46	160.5	11.93	45.1	15.91	2.414	186.8	68.65	34.06	113.2	5.672	45.21	56.54	3.148	0.407	9.746	3.684	1.951
	15.3	32.56	7614.6	233.3	543.6	1030.2	35.73	186.8	20.98	51.79	18.74	3.315	159.5	68.93	29	118.6	5.927	46.57	64.73	3.361	0.396	12.65	3.821	1.895
	16.3	31.74	6399.9	195.2	429.2	1979.8	48.33	213.8	8.722	66.46	15.61	2.228	84.72	86.74	34.88	113.4	5.037	21.32	31.83	2.926	0.35	10.09	3.29	6.858
	17.8	26.8	5744.4	160.4	446.5	1403.7	49.14	158.7	6.989	90.25	14.13	2.379	17.33	123.1	26.41	98.54	4.606	8.071	34.85	2.636	0.335	17.04	3.05	1.475
	19.3	28.72	6257.3	155.5	447.9	1500.8	27.09	117.6	11.94	59.66	13.69	2.888	32.35	122.6	36.02	106.2	4.976	7.59	62.1	2.699	0.356	17.74	3.126	3.079
Gabbroic diorites	20.6	15.18	4812.8	160.9	21.21	988.6	28.04	54.05	6.526	58.36	19.36	2.581	208.8	61.63	14.72	103	5.99	50.25	978.4	2.862	0.483	6.691	3.748	1.594
	21.5	14.41	4071.5	145.4	15.61	1353.1	56.36	91.64	32.98	86.31	16.32	3.134	227.2	66.94	23.68	117.4	5.173	49.03	254.4	3.427	0.675	19.37	5.167	2.485
	22.5	22.08	5121.1	150.5	23.48	541.9	30.14	24.69	14.1	99.29	19.45	2.22	106.8	235.6	10.43	69.59	6.095	39.37	391.4	2.132	0.625	10.26	4.844	1.204
	23.5	19.19	4465.1	157.8	45.54	1013.8	28.18	10.36	21.75	92.29	18.66	2.589	83.24	326.7	29.59	104.5	6.077	18.32	724.5	3.041	0.654	12.35	4.338	1.456
	24.5	19.02	4944.1	165.7	101.7	869.9	32.78	8.761	18.53	90.51	19.97	2.824	80.9	342.2	23.55	113.8	7.142	14.78	404.5	3.271	1.051	12.72	5.866	1.828
	25.5	18.38	4848.7	159.7	64.85	897.1	31.58	4.943	17.29	88.66	19.55	2.394	64.96	348.3	25.84	119.688	6.274	10.89	414.3	3.384	0.756	12.22	7.167	1.83
	26.7	19.28	5159.6	166.6	50.31	900.5	95.68	6.4	21	92.08	19.74	2.574	72.01	338.2	26.08	121.593	6.095	13.5	471.8	3.5263	1.756	13.25	5.085	1.689
	27.1	17.08	5223.4	159.7	120.4	1008.5	31.13	5.636	15.92	92.77	20.01	2.49	68.82	348.1	24.14	102.311	6.172	10.2	496.9	2.9501	0.692	10.69	4.078	1.703
	28.5	19.72	4787.5	155.2	77.14	1025.9	29.44	5.796	21.42	97.87	20.25	2.447	66.09	348	23.98	100.4	5.822	9.247	497.8	2.843	0.662	11.59	4.031	1.383
	55.5	20.72	5199.1	173	319.6	1256	39.07	11.77	19.82	86.6	21.14	2.642	43.35	413.2	28.6	111.592	6.546	2.722	402.8	3.1101	0.761	11.27	4.837	2.262
	56.5	20.51	5111.7	190.2	230.2	1179.4	27.79	10.6	21.79	88.6	21.01	2.602	46.16	417.9	28.72	109.362	6.333	3.253	432.4	3.0113	0.555	12.34	3.732	1.452
Table S4
	depth(m)	La	Ce	Pr	Nd	Sm	Eu	Gd	Tb	Dy	Ho	Er	Tm	Yb	Lu
sedimentary rock	5.48	17.1221	35.8815	4.47502	21.583	11.8529	3.02059	13.2134	1.8384	9.87311	1.81208	4.70991	0.594685	3.53809	0.483746
	6.6	20.7639	42.8463	4.9394	17.9725	3.23712	0.846496	2.63733	0.359325	2.07203	0.401957	1.16828	0.164237	1.12051	0.170527
	7.23	19.293	41.9117	4.43924	15.7733	3.36175	0.920856	3.3664	0.420982	2.2731	0.444394	1.25384	0.179849	1.15864	0.166592
	8.38	17.2959	36.4903	4.32579	16.5796	3.19575	0.867797	2.788	0.405888	2.2961	0.443553	1.24159	0.182156	1.18226	0.178244
	11.3	10.4154	18.9695	2.25885	8.65312	1.77508	0.486882	1.85871	0.322961	2.13882	0.457343	1.44812	0.239274	1.72241	0.269257
	12.24	29.2505	52.6625	5.0528	15.5993	2.48794	0.750643	2.28149	0.351542	2.06961	0.425746	1.24338	0.199278	1.46628	0.228495
	13.56	23.9821	35.422	3.83885	13.7415	2.74357	0.880538	2.62455	0.387065	2.31131	0.464597	1.33861	0.203372	1.42751	0.218948
Basaltic andesite	13.9	17.13	43.08	5.608	24.3	6.443	1.694	6.759	1.14	6.697	1.357	3.453	0.478	2.846	0.415
	14.3	15.12	37.61	4.814	20.69	5.227	1.333	5.543	0.937	5.785	1.218	3.157	0.441	2.797	0.43
	15.3	12.47	30.7	3.901	16.68	4.155	1.081	4.503	0.756	4.763	1.04	2.792	0.411	2.676	0.423
	16.3	17.58	37.46	5.076	21.54	4.947	1.444	5.619	0.921	5.426	1.19	3.077	0.445	2.762	0.442
	17.8	14.74	31.03	4.106	17.32	3.947	1.178	4.447	0.734	4.464	0.964	2.523	0.368	2.295	0.369
	19.3	19.01	42.18	5.839	25.18	6.073	1.499	6.335	0.98	5.622	1.155	3.031	0.405	2.436	0.382
Gabbroic diorites	20.6	14.25	26.64	3.357	13.28	2.787	0.638	2.721	0.439	2.511	0.54	1.444	0.212	1.361	0.219
	21.5	17.84	41.3	5.59	21.47	4.889	1.166	4.586	0.778	4.838	0.985	2.656	0.407	2.724	0.415
	22.5	15.78	40.13	5.311	21.18	3.765	0.998	2.814	0.392	2.155	0.438	1.202	0.181	1.191	0.192
	23.5	21.95	46.91	6.047	23.68	5.158	1.262	5.016	0.804	4.942	1.05	2.957	0.439	2.907	0.468
	24.5	19.27	41.45	5.307	20.69	4.363	1.146	4.146	0.674	4.089	0.886	2.375	0.365	2.398	0.387
	25.5	18.82	41.12	5.359	21.19	4.68	1.17	4.504	0.728	4.486	0.939	2.629	0.392	2.571	0.417
	26.7	18.66	39.63	5.338	21.99	4.976	1.248	4.75	0.78	4.81	0.993	2.733	0.409	2.624	0.418
	27.1	17.69	38.22	5.082	20.57	4.619	1.191	4.274	0.715	4.252	0.901	2.422	0.356	2.216	0.353
	28.5	17.87	38.61	5.028	20.11	4.625	1.199	4.405	0.72	4.42	0.916	2.489	0.368	2.321	0.379
	55.5	22.38	46.85	6.173	24.81	5.372	1.365	5.002	0.831	5.003	1.049	2.782	0.412	2.592	0.409
	56.5	21.15	45.54	5.943	24.42	5.442	1.367	5.283	0.85	5.166	1.081	2.864	0.413	2.576	0.396
Table S5
well	depth(m)	MgO(%)	Al2O3(%)	CaO(%)	K2O(%)	Na2O(%)	SiO2(%)	P2O5(%)	MnO(%)	Fe2O3T(%)	Sc	V	Cr	Co	Ni	Cu	Zn	Ga	Ge	Rb	Sr	Y	Zr	Nb	Cs	Ba	La	Ce	Pr	Nd	Sm	Eu	Gd	Tb	Dy	Ho	Er	Tm	Yb	Lu	Hf	Ta	Pb	Th	U
Basaltic andesite	13.9	-0.197185	-0.0569105	-0.925841	4.22008	-0.990304	-0.345213	-0.0739616	-0.867503	-0.515263	-0.109553	-0.0464881	-0.0464881	-0.220652	0.0842474	-0.490214	-0.102696	0.138502	-0.292012	5.53486	-0.794076	-0.422647	-0.0825431	-0.00613081	8.35737	-0.338632	-0.50001	-0.433298	-0.467088	-0.464529	-0.411332	-0.372957	-0.408	-0.354547	-0.33904	-0.348096	-0.367885	-0.345125	-0.351749	-0.397204	-0.0551501	-0.131858	-0.53334	-0.0271262	-0.348725
	14.3	-0.0985694	-0.00939257	-0.209525	3.1446	-0.609524	-0.076047	0.0494297	0.062361	-0.514532	-0.00386375	-0.0965425	-0.148022	-0.203713	0.203622	-0.118833	-0.333323	0.0249179	-0.262839	4.09243	-0.506176	-0.166082	-0.0599645	0.0052595	4.25309	-0.197054	-0.298558	-0.213644	-0.272907	-0.275352	-0.240948	-0.215757	-0.22835	-0.15679	-0.0925246	-0.06999	-0.0814327	-0.0397023	0.0125991	-0.0072785	0.0286181	0.00824655	-0.515498	0.0393289	-0.441183
	15.3	0.00811064	-0.0213615	-0.603275	2.26623	-0.547659	-0.143851	-0.0942398	-0.462494	-0.150827	-0.0683778	0.23289	-0.00267141	0.0838368	0.305297	0.443913	-0.28665	0.12488	-0.0567513	3.0516	-0.537983	-0.338402	-0.0823014	-0.0211989	4.04202	-0.143448	-0.460956	-0.401903	-0.450994	-0.455648	-0.437778	-0.407397	-0.415889	-0.366078	-0.303807	-0.260069	-0.243046	-0.166076	-0.0972891	-0.0900513	0.023306	-0.0859182	-0.414028	0.00444913	-0.494246
	16.3	0.243662	0.0624567	-0.0703409	1.23979	-0.417085	0.0794066	-0.109987	0.249155	-0.553169	0.0805286	0.227335	-0.0631017	0.744302	0.777519	-0.285791	0.089158	0.114842	-0.245721	1.5605	-0.30826	-0.0532255	0.0440044	-0.0102959	1.74637	-0.49886	-0.0958291	-0.13169	-0.150043	-0.16362	-0.203561	-0.0581552	-0.132786	-0.0811442	-0.0563678	0.00734623	-0.00744325	0.0742832	0.108562	0.131287	0.0599496	-0.03876	-0.443902	0.0290126	1.17772
	17.8	0.825058	0.0483061	-0.154384	-0.436079	-0.177136	0.142131	-0.0499336	0.0311689	-0.133289	0.0164655	0.123612	0.0858822	0.975916	0.469982	-0.362393	0.647807	0.124297	-0.102696	-0.416465	0.0937294	-0.201331	0.0107188	0.00829094	0.158318	-0.388701	-0.155387	-0.198659	-0.234011	-0.250737	-0.292044	-0.143976	-0.23535	-0.184146	-0.135081	-0.0908462	-0.0932791	-0.0102281	0.0262371	0.052217	0.0638608	0.0250313	0.0463049	0.062804	-0.478175
Gabbroic diorites	20.6	0.169847	0.0402472	0.00619121	1.80493	-0.687608	0.0962919	-0.0083741	-0.0447426	-0.0175264	-0.211225	-0.0509158	-0.917352	-0.101525	4.17636	-0.663996	-0.286366	-0.0159836	0.0544351	3.99751	-0.841133	-0.449831	-0.00131545	-0.00358736	17.0174	1.50969	-0.298673	-0.382263	-0.40641	-0.422087	-0.447865	-0.499695	-0.433214	-0.440511	-0.470991	-0.456864	-0.452075	-0.449476	-0.435804	-0.417169	0.00164406	-0.213705	-0.392859	-0.0629474	-0.0805228
	21.5	1.20543	0.081898	0.214754	2.50276	-0.666885	0.238706	-0.599747	0.602555	0.395391	-0.114908	0.0138098	-0.928099	1.13473	9.37426	1.0072	0.24757	-0.0194709	0.513471	5.42798	-0.796028	0.0461969	0.345558	0.017181	19.7808	-0.228627	0.0378727	0.132043	0.168397	0.104435	0.144911	0.080826	0.129192	0.17206	0.204829	0.171102	0.191311	0.249333	0.334819	0.30554	0.417755	0.29893	1.07765	0.527025	0.694425
	22.5	-0.194891	0.086309	-0.35979	0.414861	-0.100144	0.114967	-0.0207887	-0.497874	-0.223378	0.0782385	-0.165705	-0.914015	-0.092376	1.22221	-0.317739	0.141039	-0.0709242	-0.147647	1.40231	-0.429243	-0.633641	-0.365878	-0.0471585	12.2665	-0.0564619	-0.270127	-0.125473	-0.117436	-0.133786	-0.299017	-0.264506	-0.44913	-0.530487	-0.573324	-0.585978	-0.57136	-0.558273	-0.536	-0.519786	-0.298762	-0.0437901	-0.125056	0.138159	-0.3473
	23.5	0.224533	0.0970206	0.168826	0.421539	0.0356099	0.217218	-0.0586242	0.039752	0.216544	0.074788	0.00328041	-0.808729	-0.0267245	0.0694364	0.207043	0.216415	0.0222926	0.140067	1.14744	-0.0922693	0.192065	0.0921292	0.0896029	6.08025	1.00313	0.164413	0.17247	0.152503	0.110742	0.101428	0.066694	0.126197	0.104459	0.12224	0.138337	0.209405	0.228773	0.298924	0.34249	0.147167	0.14758	0.207903	0.169016	-0.0947247
	24.5	0.0679582	0.101856	-0.00704967	0.391766	0.093006	0.164494	0.00847841	-0.169587	0.248898	-0.0379397	-0.0485592	-0.614236	0.0224632	-0.183243	-0.0712842	0.0773767	-0.0119348	0.123071	0.884873	-0.141319	-0.14318	0.0740981	0.156492	4.15872	0.0100274	-0.076795	-0.0643688	-0.0865286	-0.123533	-0.158597	-0.125199	-0.159321	-0.163825	-0.161421	-0.13252	-0.122741	-0.077335	-0.0323199	0.00258269	0.114384	0.665528	0.12356	0.427634	0.0264538
	25.5	0.0534069	0.0670948	-0.030296	0.285995	0.0589246	0.124384	-0.076842	-0.139485	0.0495435	-0.0520199	-0.0649688	-0.749174	0.0044141	-0.530115	-0.116382	0.0761199	-0.0136837	-0.0292028	0.543269	-0.108816	-0.0413648	0.151897	0.0359276	2.87576	0.0548519	-0.0806138	-0.0535554	-0.0594291	-0.0846901	-0.0797061	-0.0893065	-0.068761	-0.0790613	-0.0619023	-0.0625394	-0.00981405	0.0104136	0.0579049	0.101558	0.175565	0.221611	0.100632	0.778584	0.0477948
	26.7	0.00802198	0.0460511	-0.0901601	0.216988	-0.0248198	0.0975331	-0.116615	-0.169698	0.0814203	-0.06552	-0.0833459	-0.817137	1.85977	-0.428271	0.0085511	0.0502859	-0.0641076	-0.0191058	0.607672	-0.186801	-0.0907617	0.0997192	-0.0542684	3.51515	0.12887	-0.143358	-0.142813	-0.119568	-0.107369	-0.0804606	-0.0871273	-0.0770766	-0.0727364	-0.0547577	-0.0683646	-0.032669	-0.00929196	0.0146533	0.037664	0.151184	1.66652	0.121492	0.18587	-0.0912089
	27.1	0.00900907	0.0262819	-0.0819474	0.241351	0.0136384	0.074514	-0.0420532	-0.143159	-0.00516214	-0.182263	-0.132043	-0.567724	-0.0809232	-0.502671	-0.244761	0.0452316	-0.0628943	-0.0627062	0.517687	-0.17322	-0.168676	-0.0859761	-0.054018	2.36978	0.174404	-0.197808	-0.183409	-0.17203	-0.17521	-0.156858	-0.139462	-0.179706	-0.16039	-0.17462	-0.165004	-0.153217	-0.148205	-0.153579	-0.134399	-0.0486834	0.0379807	-0.10624	-0.0605879	-0.0948682
	28.5	0.0928708	0.119696	-0.0854615	0.312095	0.0823453	0.170626	0.0198238	0.0111394	0.103026	0.0300947	-0.0796999	-0.697825	-0.0516798	-0.441985	0.108678	0.203093	0.0346918	0.00497408	0.590185	-0.0982014	-0.0989963	-0.0213805	-0.0264155	2.33309	0.283654	-0.115863	-0.099967	-0.106243	-0.120237	-0.0788954	-0.0548036	-0.0775875	-0.0775383	-0.0638885	-0.0738114	-0.0505598	-0.0393229	-0.0327556	0.0139742	0.000252571	0.0833921	0.0572338	0.0131325	-0.198019
